# Supplementary material for: Concentrations of dissolved dimethyl sulfide (DMS), methanethiol and other trace gases in context of microbial communities from the temperate Atlantic to the Arctic Ocean
Source: Copernicus journal article supplement (doi:10.5194/bg-20-851-2023), 2023-02-24
Supplement: Supplementary file 1 [file bg-20-851-2023-supplement.pdf]

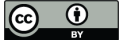

*Supplement of*

**Concentrations of dissolved dimethyl sulfide (DMS), methanethiol and other trace gases in context of microbial communities from the temperate Atlantic to the Arctic Ocean**

**Valérie Gros et al.**

*Correspondence to:* Valérie Gros ([valerie.gros@lsce.ipsl.fr](mailto:valerie.gros@lsce.ipsl.fr))

The copyright of individual parts of the supplement might differ from the article licence.

Supplement S1

Table S1: Sea-ice stations north of 80°N where vertical profiles were obtained

| Station    | Date/Time (UTC)  | Latitude     | Longitude    | Sampling depths (m) |
|------------|------------------|--------------|--------------|---------------------|
| PS92/19_05 | 28/05/2015 06:28 | 81° 10.43' N | 19° 08.07' E | 0.5-10-20-30-40-50  |
| PS92/27_03 | 31/05/2015 06:52 | 81° 23.13' N | 17° 35.13' E | 0.5-10-20-30-40-50  |
| PS92/31_03 | 03/06/2015 11:44 | 81° 37.20' N | 19° 25.64' E | 0.5-10-25-30-40-50  |
| PS92/32_05 | 06/06/2015 20:04 | 81° 13.76' N | 19° 26.63' E | 0.5-10-25-30-40-50  |
| PS92/39_08 | 11/06/2015 15:05 | 81° 55.04' N | 13° 27.55' E | 0.5-10-30-35-40-50  |
| PS92/43_05 | 15/06/2015 04:45 | 82° 12.67' N | 07° 35.30' E | 0.5-10-20-30-40-50  |
| PS92/46_02 | 15/06/2015 04:45 | 82° 12.67' N | 07° 35.30' E | 0.5-10-20-30-40-50  |
| PS92/47_04 | 19/06/2015 12:03 | 81° 20.80' N | 13° 36.56' E | 0.5-10-20-30-40-50  |

Supplement S2

Biological measurements

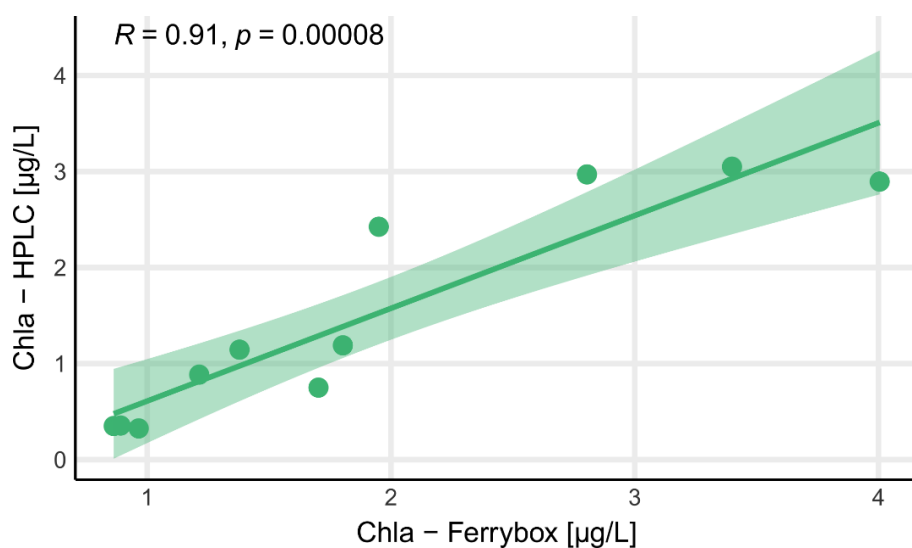

Figure S1: Relationship between chlorophyll a concentrations obtained from HPLC and Ferrybox.

## Bacterial community analyses

16S rRNA gene amplicon libraries were prepared according to the standard instructions of the 16S Metagenomic Sequencing Library Preparation protocol (Illumina, San Diego, CA). The hypervariable V4–V5 region was amplified using primers 515F (GTGYCAGCMGCCGCGGTAA) and 926R (CCGYCAATTYMTTTRAGTTT). Sequences were obtained on an Illumina MiSeq platform in 2x300 bp paired-end runs at CeBiTec (Bielefeld, Germany). Primer were clipped using cutadapt, and reads processed into amplicon sequence variants (ASVs) following the standard DADA2 workflow at <https://benjjneb.github.io/dada2/tutorial.html>. Filtering settings were truncLen=c(230,195), maxN=0, minQ=2, maxEE=c(3,3) and truncQ=0, followed by merging using minOverlap=10, chimera removal and taxonomic classification using the Silva v138 database. Data was processed in RStudio using R v4.1.1 and packages phyloseq, vegan, iNEXT, tidyverse, psych and scico, with aesthetic modifications of figures using Inkscape (<https://inkscape.org>). We obtained on average 85,000 quality-controlled, chimera-filtered reads per sample (Table S2) sufficiently covering community composition (Fig. S2). The complete amplicon workflow is available under <https://github.com/matthiaswietz/transsiz>.

Table S2: Amplicon-sequenced samples, showing read counts at each step of the DADA2 pipeline.

| sample_title | Date       | Lat      | Lon      | input  | filtered | denoised | merged | nochim | tabled |
|--------------|------------|----------|----------|--------|----------|----------|--------|--------|--------|
| PS92 Auto2   | 21.05.2015 | 60.35920 | 3.29927  | 118097 | 98967    | 98357    | 82764  | 82764  | 80333  |
| PS92 Auto3   | 21.05.2015 | 62.38333 | 3.35833  | 92223  | 78393    | 78082    | 70022  | 70022  | 67872  |
| PS92 Auto4   | 22.05.2015 | 64.52022 | 3.55040  | 131377 | 110858   | 110483   | 93018  | 93018  | 90123  |
| PS92 Auto5   | 22.05.2015 | 64.94027 | 3.58943  | 129259 | 109748   | 109459   | 104074 | 104074 | 98374  |
| PS92 Auto6   | 22.05.2015 | 65.90325 | 3.64348  | 159876 | 139180   | 138735   | 126581 | 126581 | 122124 |
| PS92 Auto7   | 22.05.2015 | 66.35847 | 3.72702  | 94039  | 79638    | 79452    | 66107  | 66107  | 64204  |
| PS92 Auto8   | 22.05.2015 | 66.76948 | 3.76842  | 147626 | 123900   | 123608   | 98729  | 98729  | 94205  |
| PS92 Auto9   | 23.05.2015 | 67.31610 | 3.82471  | 88694  | 75721    | 75541    | 64079  | 64079  | 61492  |
| PS92 Auto10  | 23.05.2015 | 67.89882 | 3.88550  | 103359 | 83813    | 83655    | 69791  | 69791  | 66430  |
| PS92 Auto11  | 23.05.2015 | 68.33135 | 3.91565  | 85213  | 72459    | 72343    | 59608  | 59608  | 57793  |
| PS92 Auto12  | 23.05.2015 | 68.68500 | 3.97063  | 130307 | 108826   | 108595   | 95159  | 95159  | 91516  |
| PS92 Auto13  | 23.05.2015 | 69.28850 | 4.01345  | 80729  | 67543    | 67404    | 55925  | 55925  | 54072  |
| PS92 Auto14  | 23.05.2015 | 69.49642 | 4.01595  | 121385 | 104120   | 103898   | 93522  | 93522  | 89969  |
| PS92 Auto15  | 24.05.2015 | 70.00000 | 10.00000 | 102120 | 86176    | 85987    | 77672  | 77672  | 74763  |
| PS92 Auto16  | 24.05.2015 | 70.22695 | 13.14900 | 114758 | 98526    | 98230    | 87839  | 87839  | 83624  |
| PS92 Auto17  | 25.05.2015 | 73.25000 | 12.25000 | 128590 | 108477   | 108250   | 91623  | 91623  | 88079  |
| PS92 Auto18  | 25.05.2015 | 74.13037 | 11.69167 | 138591 | 116132   | 115847   | 104990 | 104990 | 100890 |
| PS92 Auto19  | 25.05.2015 | 74.84322 | 11.20822 | 108687 | 91919    | 91697    | 87735  | 87735  | 82825  |
| PS92 Auto20  | 26.05.2015 | 75.51768 | 10.72912 | 179367 | 152923   | 152479   | 146291 | 146291 | 137753 |
| PS92 Auto21  | 26.05.2015 | 76.76033 | 9.78639  | 137058 | 115973   | 115657   | 109506 | 109506 | 104299 |
| PS92 Auto22  | 26.05.2015 | 77.27977 | 9.35135  | 164814 | 141216   | 140814   | 129011 | 129011 | 124403 |
| PS92 Auto23  | 27.05.2015 | 80.87068 | 18.44780 | 123060 | 102837   | 102585   | 96182  | 96182  | 91236  |
| PS92 Auto24  | 27.05.2015 | 81.01718 | 19.84131 | 111661 | 93595    | 93043    | 84908  | 84908  | 79382  |
| PS92 Auto25  | 28.05.2015 | 81.17000 | 19.13450 | 133543 | 112984   | 112116   | 103696 | 103696 | 97757  |
| PS92 Auto26  | 28.05.2015 | 81.19041 | 19.09177 | 143276 | 122930   | 122362   | 107995 | 107995 | 102390 |
| PS92 Auto27  | 29.05.2015 | 81.20624 | 18.69745 | 87506  | 74860    | 74472    | 61118  | 61118  | 58023  |
| PS92 Auto28  | 29.05.2015 | 81.22513 | 18.58100 | 158441 | 138134   | 137782   | 129089 | 129089 | 121849 |
| PS92 Auto31  | 30.05.2015 | 81.23292 | 18.76116 | 107153 | 91266    | 91018    | 81765  | 81765  | 77238  |
| PS92 Auto33  | 01.06.2015 | 81.32160 | 17.30839 | 146149 | 124768   | 124324   | 111819 | 111819 | 107371 |
| PS92 Auto34  | 02.06.2015 | 81.52571 | 19.44756 | 122832 | 105891   | 105552   | 95344  | 95344  | 89608  |
| PS92 Auto35  | 03.06.2015 | 81.55412 | 19.51593 | 89976  | 73560    | 73331    | 57493  | 57493  | 55347  |
| PS92 Auto36  | 04.06.2015 | 81.52757 | 18.65566 | 81157  | 68831    | 68620    | 62260  | 62260  | 58519  |
| PS92 Auto38  | 11.06.2015 | 81.90915 | 13.40468 | 72012  | 59645    | 59380    | 49796  | 49796  | 48994  |
| PS92 Auto39  | 15.06.2015 | 82.20975 | 7.38825  | 97048  | 82690    | 82426    | 70980  | 70980  | 69627  |

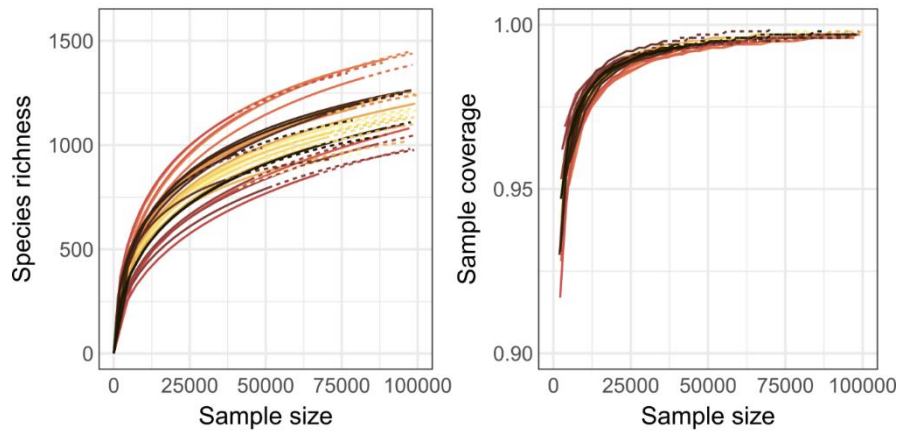

Figure S2: Rarefaction (left) and coverage (right) analyses of amplicon sequence variants, showing that community composition was sufficiently covered. Each coloured line corresponds to an individual sample.

Supplement S3  
Extraction system

Dissolved gases in seawater were quantified in the headspace of a glass cell, where gases were extracted by stripping with zero air at a flow rate of 100 mL/min. Three mini-water liquid diaphragm pumps KNF (type FEM 1.02.KT.18S. KNF (KNF Neuberger, IncTrenton, New Jersey USA) were used for the injection and circulation of seawater in the cell at 20 mL/min. Before entering the extraction cell, the water went through a mixing cell which was used for injection of a calibrated solution. For calibration, secondary standard liquid solutions were injected at a flow rate of 250  $\mu\text{L}/\text{min}$  via a fine metering pump (World Precision Instruments; Hitchin, Hertfordshire, UK), and diluted in an identical flow of 20 mL/min of pure distilled water. Figure S3 shows a schematic view of the extraction device.

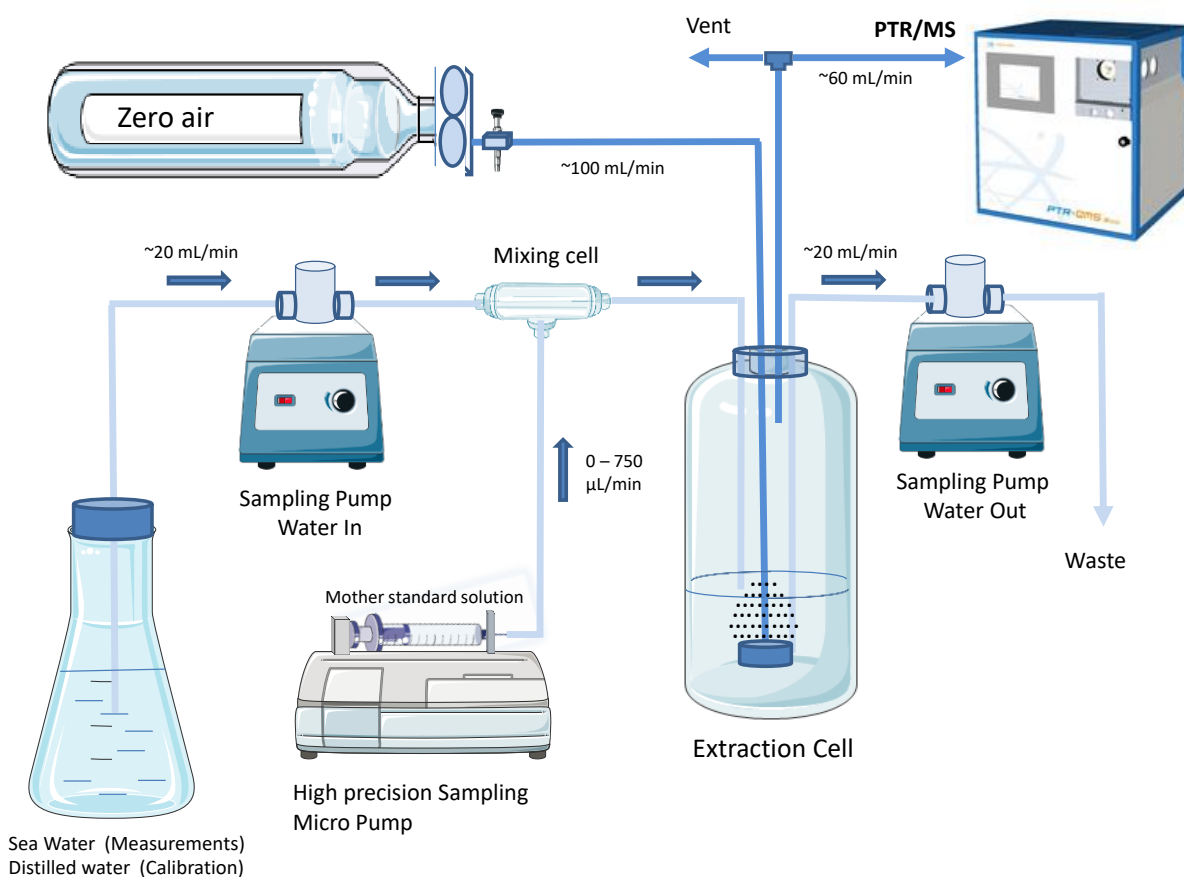

Figure S3: Schematic view of the extraction system

## Supplement S4

### Calibration procedure, detection limit and evaluation of uncertainties

For the calibration, stock solutions were prepared from pure substances (Sigma Aldrich) diluted in distilled water: isoprene ( $1.0 \times 10^{-4}$  M), dimethylsulphide ( $2.7 \times 10^{-3}$  M), acetaldehyde ( $8.95 \times 10^{-3}$  M), acetone ( $2.73 \times 10^{-2}$  M), acetonitrile ( $7.67 \times 10^{-3}$  M), and methanol ( $1.24 \times 10^{-1}$  M), all stored at 4°C. Secondary standard liquid solutions were prepared immediately before the calibrations from a dilution of  $2 \times 10^{-4}$  (0.2 mL/L) in distilled water. The injection of liquid standard was achieved by dilution of stock solution in distilled water by a high-precision micropump. The calibration factor was expressed as the ratio of the concentration of a given VOC in water (nmol/L or pmol/L) to the concentration in the head space (ppbv) measured by PTR/MS. An example is given for the calibration for acetone (Fig. S4), with excellent linearity between the PPB measured in the headspace by PTRMS and the concentration in water. Experimentally this calibration factor is very close to the Henry's law constant (expressed in mol/L per atmosphere) irrespective of a compound solubility over 4 to 5 orders of magnitude (Fig. S5). Therefore, knowing the Henry's law constant, measurements can be reasonably extrapolated to new compounds detected in water which have not been previously calibrated (such as methanethiol).

Concerning the gas-phase calibration, a complete calibration had been done one month before the campaign in the laboratory using a calibration unit (Ionicon Analytik) and by injecting different amounts of a calibration gas mixture (Ionicon), allowing to derive sensitivity ncps/ppb for all compounds contained in the standard (methanol, acetaldehyde, acetonitrile, acetone and isoprene were of interest for this study). On the same day, a gas cylinder has been measured and brought on-board in order to check the stability of the detection (at the beginning and in the middle of the campaign). As lab- and ship-based results (in ncps) were congruent, the lab-determined calibration coefficients were used for the campaign. As the standard did not include DMS, the calibration was done directly on water using the relation between ncps of DMS and concentrations of compounds in the injected standard. The sensitivity of MeSH ( $m/z$  49) has been determined by taking an average sensitivity factor (13.4 ncps/ppb) between the sensitivity from the two "neighbouring" compounds ( $m/z$  45, acetaldehyde and  $m/z$  59, acetone) with similar sensitivity (within 6%, 13.0 ncps/ppb and 13.8 ncps/ppb respectively).

During the campaign, a blank of the system was determined by injecting only the extraction gas through the system, taking into account the instrumental background noise from the instrument and potentially residual VOCs in the extraction gas. This value was subtracted from all measurements. The detection limit was estimated as 3 sigma of the blank variability, varying from 0.3 nM (for acetonitrile) to 3 nM (for acetone and acetaldehyde). Some values in Fig. 2 are below the estimated detection limit for acetone and acetaldehyde; which is due to the subtraction of the blank (the measured signal was above the detection limit).

A complete estimation on the gas-phase measurement of this PTRMS has been performed in Baudic et al. (2016). This estimation, based on the ACTRIS measurement guidelines VOC 2014 (see Debevec et al., 2017), calculates the expanded uncertainty of  $U(X)$  as

$$U(X) = k \times u(X) + DL_x/3$$

With  $k$  being the coverage factor (here 2),  $u(X)$  the combined uncertainty in  $X$ , and  $DL_x$  the detection limit of the species  $X$ . The combined uncertainty includes errors on standard gas, calibrations, blanks, reproducibility/repeatability, linearity, and relative humidity parameters. This expanded uncertainty has a maximum of 21% (21%, 18%, 9% and 10% for  $m/z$  42, 45, 59 and 69 respectively). We do not give here the detailed contribution of each factor, as those calculations were not done specifically for this campaign. Nevertheless, we note that the two main sources contributing to the overall uncertainty were due to linearity error and to the uncertainty of VOC concentrations in the calibration standard gas. An additional uncertainty is the conversion of gaseous ppb into nM (based on the error of the calibration linearity, see calibration example for acetone in S4a). The overall uncertainty was then estimated at 21%, 32%, 11% and 11% for  $m/z$  42, 45, 59 and 69 respectively. Therefore, the uncertainty for the calibrated compounds (including DMS, which was not present in the gas-phase standard but which has been calibrated with a liquid standard) has been estimated at about 30%.

As MeSH has been quantified using a sensitivity coefficient based on the average of the sensitivity of acetaldehyde and acetone, we assessed the uncertainty by comparing (i) to an averaged sensitivity coefficient, and (ii) to an estimated DMS sensitivity coefficient. For (i), the average sensitivity coefficient of 9.4 ncps/ppb represents the mean of 10 sensitivity coefficients (determined for  $m/z$  33, 42, 45, 59, 69, 71, 73, 79, 93 and 107). If applying such a sensitivity coefficient to MeSH, it would increase concentrations by a factor of 1.43. As mentioned, DMS was not present in the standard that we had at that time. Recently, we have purchased a NPL (National Physics Laboratory, Teddington, UK) standard containing a series of compounds, including acetaldehyde, acetone and DMS. We have performed three calibrations (on different days) in the laboratory with the same PTRMS used during TRANSSIZ. Taking into account the ratio of the DMS sensitivity (14.4 ncps/ppb) compared to an average of acetaldehyde-acetone sensitivity (21.2 ncps/ppb) we obtained a value of 1.47, hence almost identical to the first evaluation. Overall, we conclude that due to the absence of a calibrated standard for MeSH, concentrations reported in this paper might be underestimated by a factor of  $\sim 1.5$ .

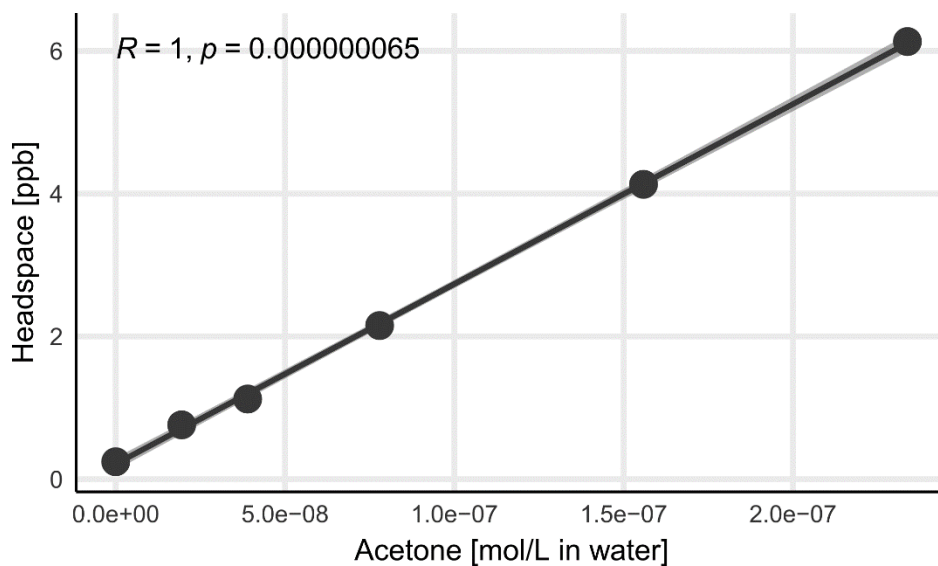

Figure S4a: Calibration of acetone performed on-board

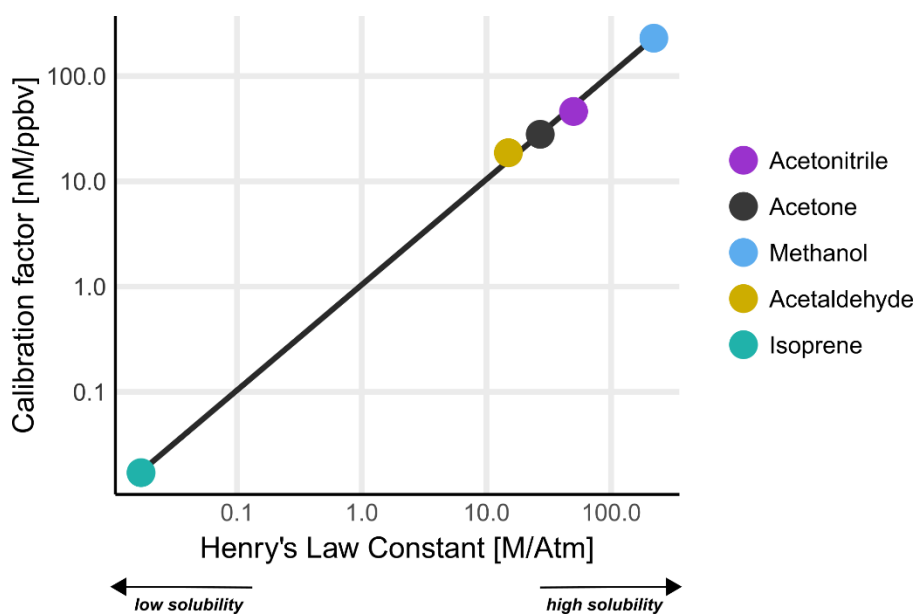

Figure S4b: Calibration factor against Henry's law constant



Supplement S5

Vertical profiles of selected phytoplankton groups

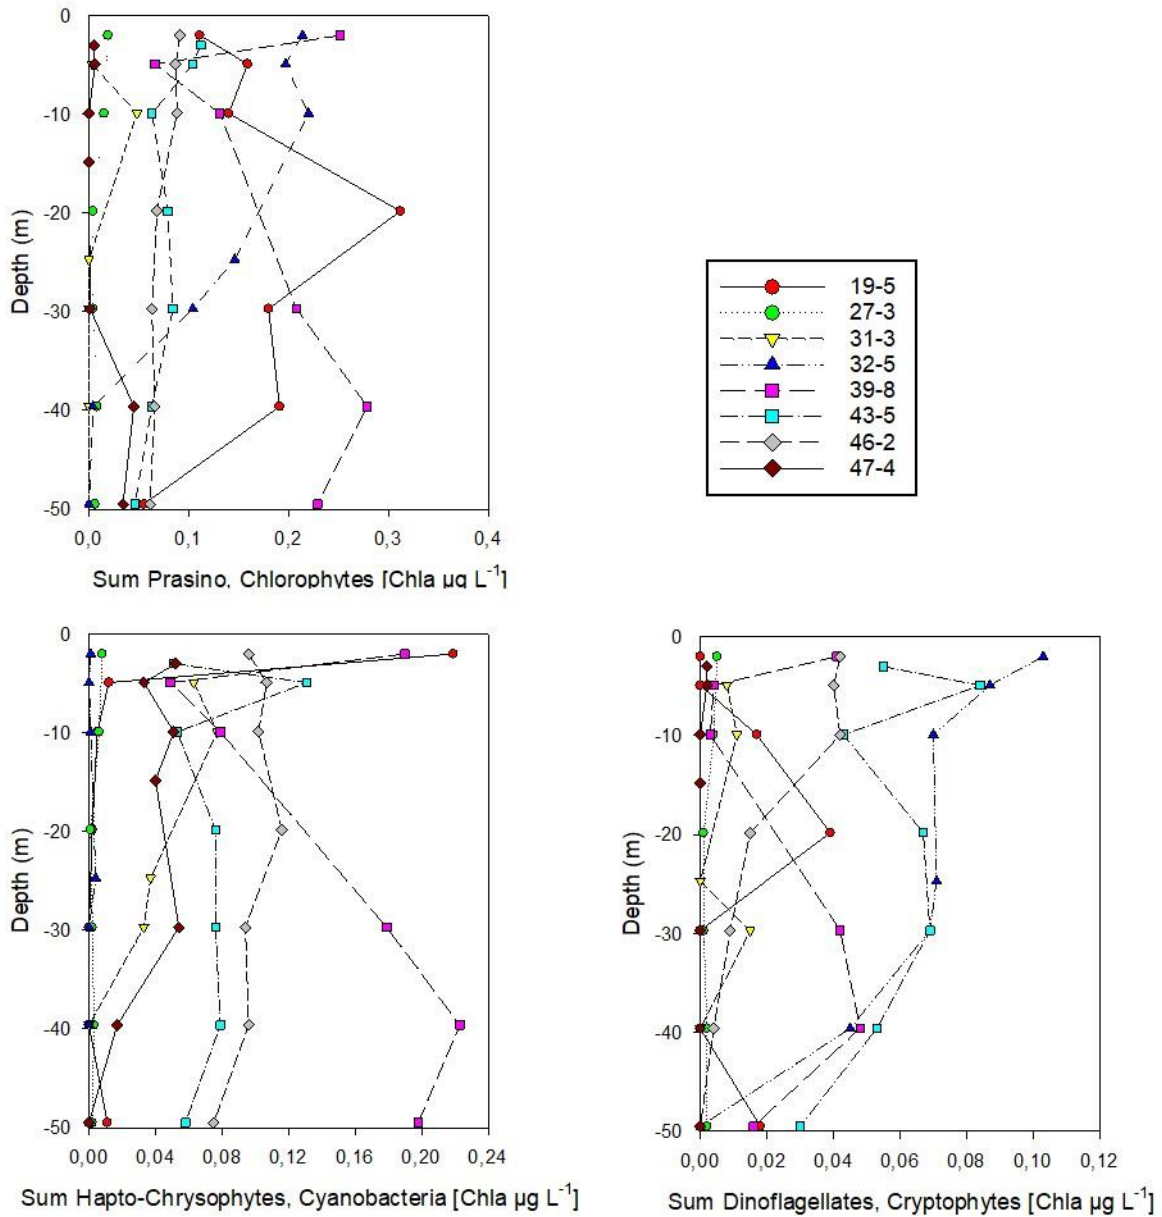

Figure S5: Vertical distribution (0-50 m depth) of selected phytoplankton groups at sea-ice covered stations north of 80°N. According to Dybwad et al., (2021) stations 39, 43, 46 (Yermak Plateau) were in pre-bloom phase, while all other stations were in a bloom phase. Stations 19 and 32 were shelf stations. The contribution of the phytoplankton groups is expressed as Chl a concentrations. Data are available at Peeken et al. (2023).

## Supplement S6

### Correlation between selected trace gases and Chl a

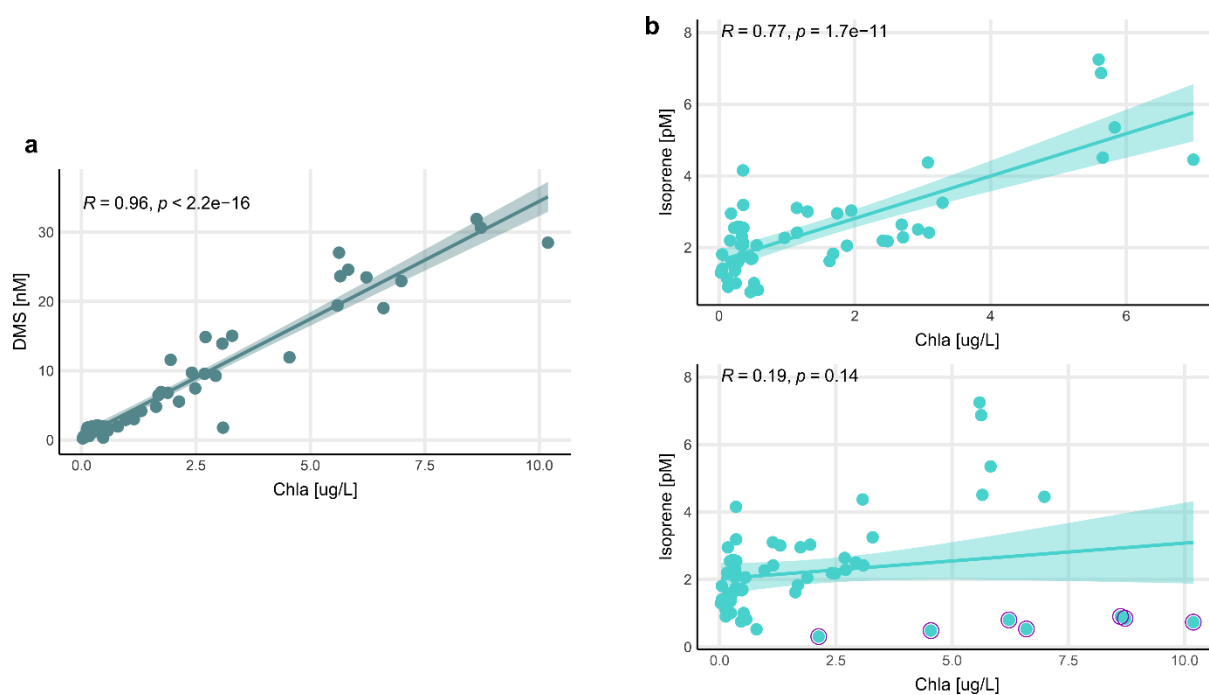

Figure S6: Correlations of DMS (a) and isoprene (b) with Chl a at sea-ice stations north of 80°N. Correlations with isoprene were only significant when excluding station 19 (upper panel; see explanation in the main text). The lower panel includes all data points north of 80°N. Data from station 19 are encircled in purple.

### Supplementary references

- ACTRIS Measurement Guidelines VOC: WP4-NA4: Trace gases networking: Volatile organic carbon and nitrogen oxides Deliverable D4.9: Final SOPs for VOCs measurements, 2014.
- Baudic, A., Gros, V., Sauvage, S., Locoge, N., Sanchez, O., Sarda-Estève, R., Kalogridis, C., Petit, J.-E., Bonnaire, N., Baisnée, D., Favez, O., Albinet, A., Sciare, J., and Bonsang, B.: Seasonal variability and source apportionment of volatile organic compounds (VOCs) in the Paris megacity (France), *Atmos. Chem. Phys.*, 16, 11961–11989, <https://doi.org/10.5194/acp-16-11961-2016>, 2016.
- Callahan, B.J., McMurdie, P.J., Rosen, M.J., Han, A.W., Johnson, A.J.A., and Holmes, S.P.: DADA2: High-resolution sample inference from Illumina amplicon data. *Nat Methods*, 13, 581–583, <https://doi.org/10.1038/nmeth.3869>, 2016.
- Crameri, F.: Scientific colour maps (Version 3.0.1). doi: 10.5281/zenodo.1243909, 2018.
- Crameri, F.: Geodynamic diagnostics, scientific visualisation and StagLab 3.0. *Geosci. Model Dev.*, 11, 2541–2562, <https://doi.org/10.5194/gmd-2017-328>, 2018.
- Debevec, C., Sauvage, S., Gros, V., Sciare, J., Pikridas, M., Stavroulas, I., Salameh, T., Leonardis, T., Gaudion, V., Depelchin, L., Fronval, I., Sarda-Estève, R., Baisnée, D., Bonsang, B., Savvides, C., Vrekoussis, M., and Locoge, N.: Origin and variability in volatile organic compounds observed at an Eastern Mediterranean background site (Cyprus), *Atmos. Chem. Phys.*, 17, 11355–11388, <https://doi.org/10.5194/acp-17-11355-2017>, 2017.
- Hsieh, T.C., Ma, K.H., and Chao, A.: iNEXT: an R package for rarefaction and extrapolation of species diversity (Hill numbers). *Methods Ecol. Evol.*, 7, 1451–1456, <https://doi.org/10.1111/2041-210X.12613>, 2016.
- McMurdie P.J. and Holmes S., phyloseq: An R Package for Reproducible Interactive Analysis and Graphics of Microbiome Census Data. *PLoS ONE* 8, e61217, 2013.

- Oksanen, J., Blanchet, F.G., Kindt, R., Legendre, P., Minchin, P.R., O'Hara, R. B., Simpson, G.L., Solymos, P., Stevens, H.H., Wagner, H.: *vegan: community ecology package*; R package version 2.5-7; <https://CRAN.R-project.org/package=vegan>
- Peeken, I.; Gros, V.; Bonsang, B.; Sarda-Estève, R.; Nikolopoulos, A.: Depth profiles of trace gases, biomass and phytoplankton group composition during RV POLARSTERN cruise PS92. PANGAEA, <https://doi.org/10.1594/PANGAEA.953908>, 2023.
- Revelle W. *psych: Procedures for Psychological, Psychometric, and Personality Research*. R package version 2.1.9; <https://CRAN.R-project.org/package=psych>, 2021.
- Wickham, H., Averick, M., Bryan, J., Chang, W., D'Agostino McGowan, L., François, R., Grolemund, G., Hayes, A., Henry, L., Hester, J., Kuhn, M., Pedersen, T.L., Miller, E., Milton Bache, S., Müller, K., Ooms, J., Robinson, D., Seidel, D.P., Spinu, V., Takahashi, K., Vaughan, D., Wilke, C., Woo K., and Yutani, H.: Welcome to the Tidyverse. *J. Open Source Software*, 4, 1686, <https://doi.org/10.21105/joss.01686>, 2019.
